# Supplementary material
Source: PubMed Central journal article supplement (PMC2745946)

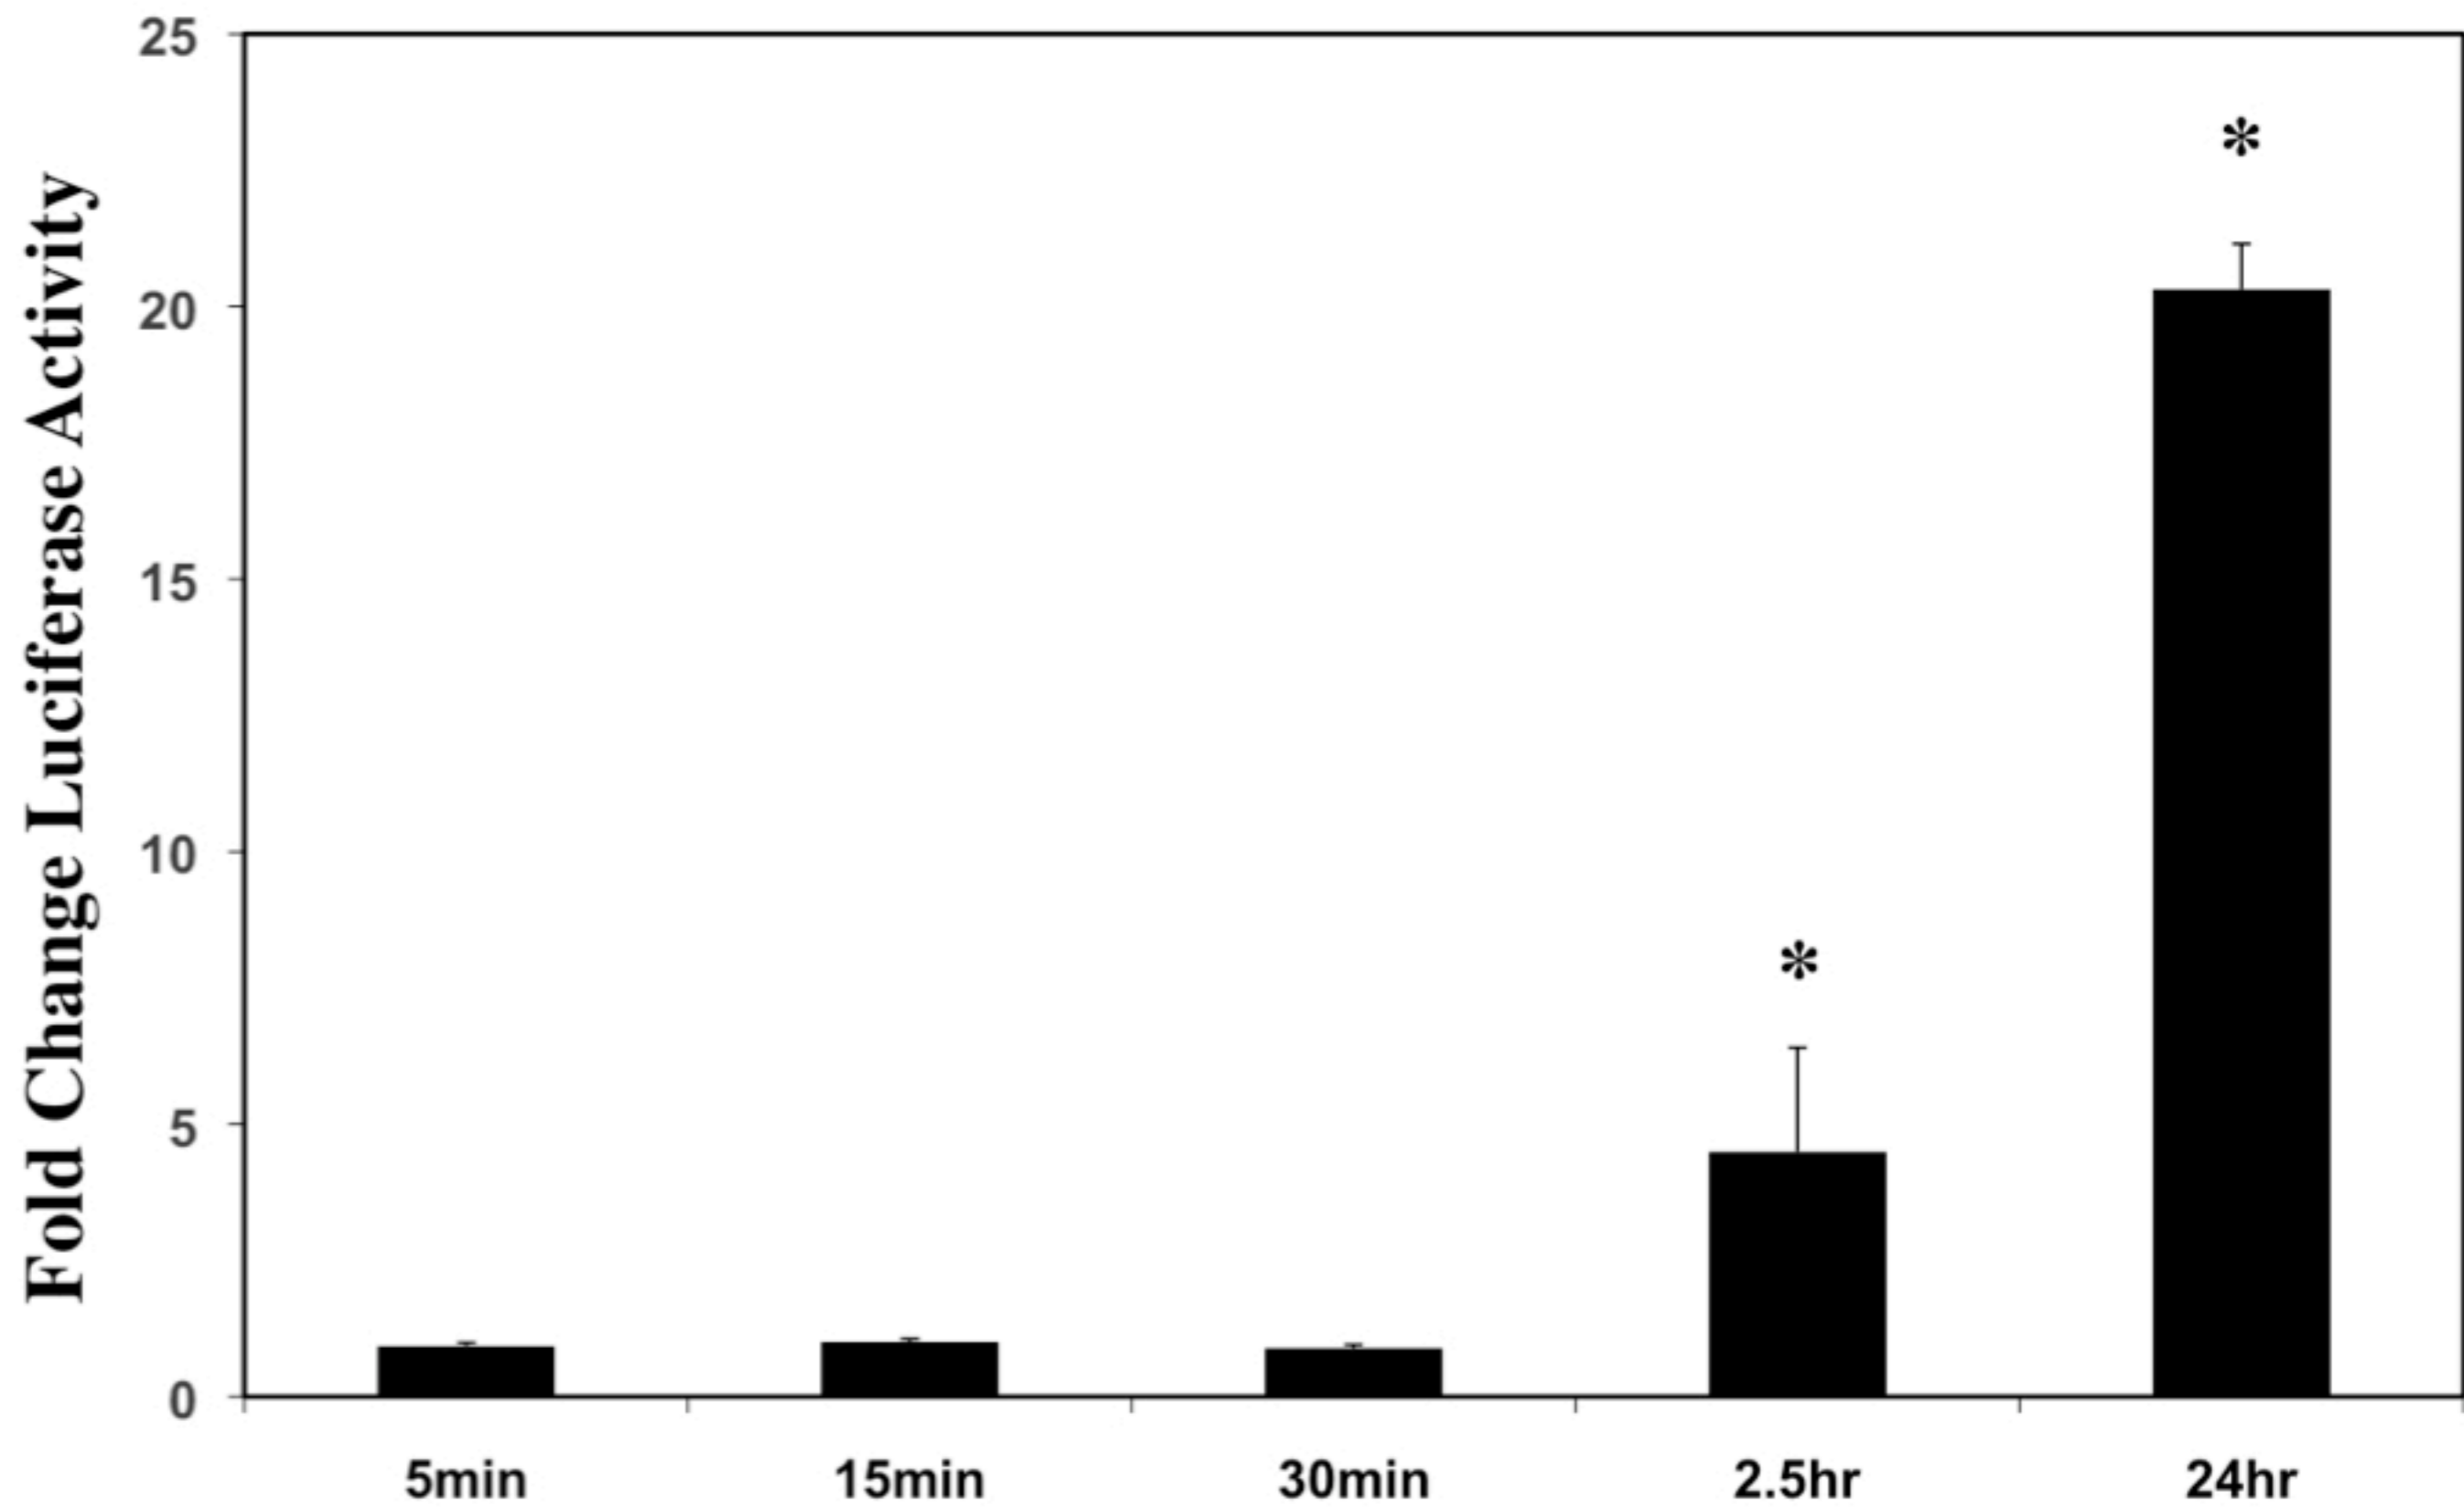

Supplement: NIHMS138959-supplement-01.pdf [file NIHMS138959-supplement-01.pdf]
